# Supplementary material
Source: publisher figshare collection journal article supplement (https://acs.figshare.com/ndownloader/files/14415038)
Supplement: Supplementary file 1 [file 14415038]

## Sheet: NNK Substitution
Primers for Comprehensive Codon Mutagenesis
#	Sequence	vendor	Length	Description
1	aGGTCTCaCATGCCTNNKNNKNNKgcttctaactttactcagttcgttctcgtcgacaatggc	Sigma	63	EV1 P(NNK)3 fwd
2	aGGTCTCaCGTTagcgaagttgcttggggcgacagtcacgtcgccagttccgccattgtcgacgagaacg	Sigma	70	EV1 P(NNK)3 rev
Primers for High-Throughput Sequencing
#	Sequence	vendor	Length	Plasmid Target
3	TCGTCGGCAGCGTCAGATGTGTATAAGAGACAGgctcttaaagaggagaaaggtcatg	IDT	58	F Amplicon Primer #1 (RNASeq PCR1)
4	GTCTCGTGGGCTCGGAGATGTGTATAAGAGACAGgttgcttggggcgacagtc	IDT	53	R Amplicon Primer #1 (RNASeq PCR1)
5	AATGATACGGCGACCACCGAGATCTACACtagatcgcTCGTCGGCAGCGTC	IDT	51	Index 2 S501
6	AATGATACGGCGACCACCGAGATCTACACctctctatTCGTCGGCAGCGTC	IDT	51	Index 2 S502
7	AATGATACGGCGACCACCGAGATCTACACtatcctctTCGTCGGCAGCGTC	IDT	51	Index 2 S503
8	AATGATACGGCGACCACCGAGATCTACACagagtagaTCGTCGGCAGCGTC	IDT	51	Index 2 S504
9	AATGATACGGCGACCACCGAGATCTACACgtaaggagTCGTCGGCAGCGTC	IDT	51	Index 2 S505
10	AATGATACGGCGACCACCGAGATCTACACactgcataTCGTCGGCAGCGTC	IDT	51	Index 2 S506
11	CAAGCAGAAGACGGCATACGAGATtcgccttaGTCTCGTGGGCTCGG	IDT	47	Index 1 N701
12	CAAGCAGAAGACGGCATACGAGATctagtacgGTCTCGTGGGCTCGG	IDT	47	Index 1 N702
13	CAAGCAGAAGACGGCATACGAGATttctgcctGTCTCGTGGGCTCGG	IDT	47	Index 1 N703
14	CAAGCAGAAGACGGCATACGAGATgctcaggaGTCTCGTGGGCTCGG	IDT	47	Index 1 N704
15	CAAGCAGAAGACGGCATACGAGATaggagtccGTCTCGTGGGCTCGG	IDT	47	Index 1 N705
16	CAAGCAGAAGACGGCATACGAGATcatgcctaGTCTCGTGGGCTCGG	IDT	47	Index 1 N706
17	CAAGCAGAAGACGGCATACGAGATgtagagagGTCTCGTGGGCTCGG	IDT	47	Index 1 N707
18	CAAGCAGAAGACGGCATACGAGATcctctctgGTCTCGTGGGCTCGG	IDT	47	Index 1 N708
19	AATGATACGGCGACCACCGAGATCTACACaaggagtaTCGTCGGCAGCGTC	IDT	51	Index 2 S507
20	AATGATACGGCGACCACCGAGATCTACACctaagcctTCGTCGGCAGCGTC	IDT	51	Index 2 S508
21	CAAGCAGAAGACGGCATACGAGATagcgtagcGTCTCGTGGGCTCGG	IDT	47	Index 1 N709
22	CAAGCAGAAGACGGCATACGAGATagcgtagcGTCTCGTGGGCTCGG	IDT	47	Index 1 N710
23	CAAGCAGAAGACGGCATACGAGATtgcttcttGTCTCGTGGGCTCGG	IDT	47	Index 1 N711
24	CAAGCAGAAGACGGCATACGAGATtcctctacGTCTCGTGGGCTCGG	IDT	47	Index 1 N712
Primers for Individual Mutant Construction
#	Sequence	vendor	Length	Plasmid Target
25	aGGTCTCaCATGCCTTCTTATCGCgcttctaactttactcagttcgttctcgtcgac	Sigma	57	PSYR -fwd
26	aGGTCTCaCATGCCTaccattcgcgcttctaactttactcagttcgttctcgtcgac	Sigma	57	PTIR -fwd
27	aGGTCTCaCATGCCTGATCATCGCgcttctaactttactcagttcgttctcgtcgac	Sigma	57	PDHR -fwd
28	aGGTCTCaCATGCCTAATTATcgcgcttctaactttactcagttcgttctcgtcgac	Sigma	57	PNYR -fwd
29	aGGTCTCaCATGCCTTATCAAcgcgcttctaactttactcagttcgttctcgtcgac	Sigma	57	PYQR -fwd
30	aGGTCTCaCGTTagcgaagttgcttggggcgacagtcacgtcgccagttccgccattgtcgacgagaacg	Sigma	70	Nterm Extension -rev
31	GATCAGCTCTAACCCGCGTTCACAGG	Sigma	26	S37P Quikchange - fwd
32	CCTGTGAACGCGGGTTAGAGCTGATC	Sigma	26	S37P Quikchange - rev
33	GCATGGCGTTCGTACTTATGCATGGAACTAACCATTCC	Sigma	38	N87C Quikchange - fwd
34	GGAATGGTTAGTTCCATGCATAAGTACGAACGCCATGC	Sigma	38	N87C Quikchange - rev
